# Supplementary material
Source: PubMed Central journal article supplement (PMC7171961)

SUPPLEMENTARY DATA

**Supplementary Figure 1. Dapagliflozin increases urinary glucose excretion.** Urine collected from WT mice treated with dapagliflozin contained substantially more glucose than PBS-control conditions. \* -  $p < 0.05$  vs. PBS control, values are mean  $\pm$  SEM.

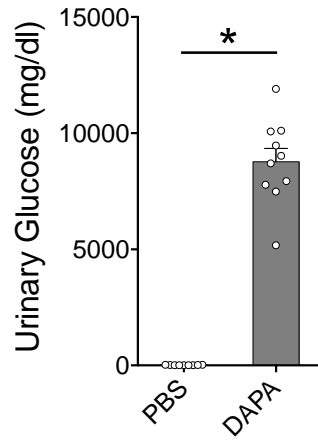

**Supplementary Figure 2. Dapagliflozin does not stimulate glucagon or insulin secretion in mouse islets.** Dapagliflozin did not stimulate glucagon or insulin at 2.7mM glucose (2.7G) or 10mM glucose (10G). Glutamine served as a positive control and stimulated glucagon at both low- and high-glucose and insulin secretion at high-glucose.

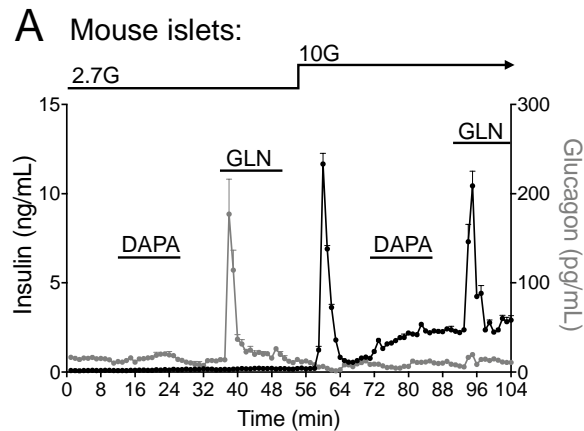

SUPPLEMENTARY DATA

**Supplementary Figure 3. Dapagliflozin stimulates ketosis independent of hydration.** A) Dapagliflozin stimulated ketogenesis to the same extent in mice with free access to water versus no water access for 3 hrs of treatment. B) Body weight loss over the fasting and dapagliflozin treatment were similar across groups. Data are presented as mean  $\pm$  SEM.

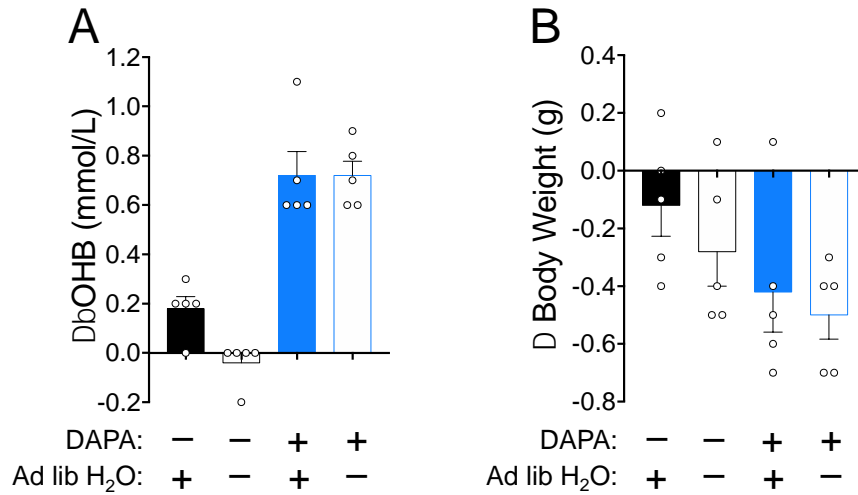

**Supplementary Figure 4. 1 mg/kg glucagon induces a significant drop in circulating ketones.** 5 hr fasted WT mice were administered 1mg/kg glucagon i.p. and ketones significantly dropped by 10 min post-injection. \* -  $p < 0.05$  vs. PBS control, values are mean  $\pm$  SEM.

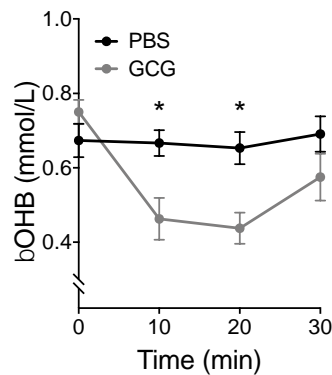

SUPPLEMENTARY DATA

**Supplementary Figure 5. Dapagliflozin-induced ketosis is not increased with exogenous addition of glucagon.** (A) Glucagon (20 $\mu$ g/kg) significantly elevated glucose in PBS-treated mice, but not in dapagliflozin-treated mice. Glucagon had no effect on (B)  $\beta$ OHB levels or (C) circulating NEFA in either PBS- or dapagliflozin-treated mice. \* -  $p < 0.05$  vs. PBS control, values are mean  $\pm$  SEM.

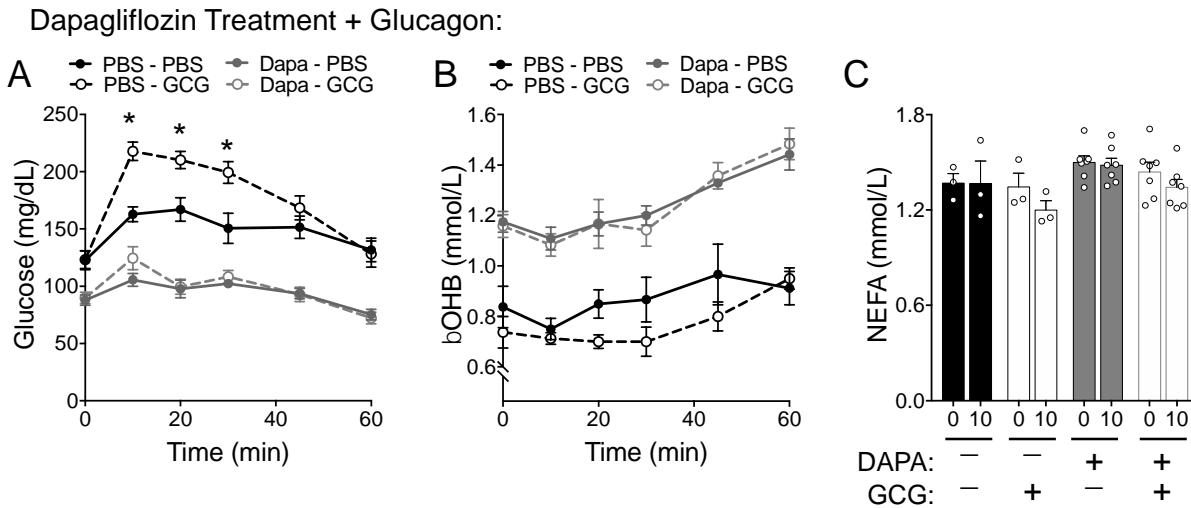

**Supplementary Figure 6. Mice with low insulin from overnight fasting maintain increased dapagliflozin-induced ketogenesis.** Mice were fasted for 12hrs followed by 3hrs of dapagliflozin treatment. (A) Glycemia was similar between PBS- and dapagliflozin-treated controls. (B)  $\beta$ OHB was significantly elevated in dapagliflozin-treated mice, with no effect on (C) NEFA levels. \* -  $p < 0.05$  vs. 3hr PBS control, values are mean  $\pm$  SEM.

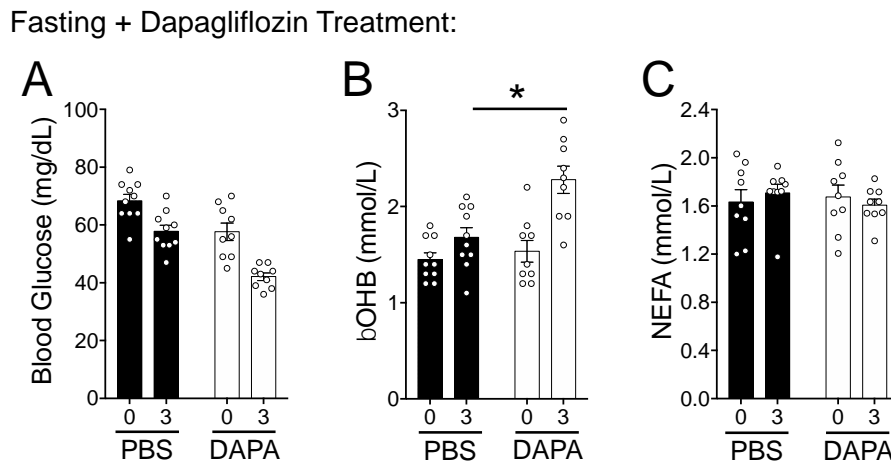

Supplement: DB191216SupplementaryData.pdf [file DB191216SupplementaryData.pdf]
